# Supplementary material for: A novel ferroptosis inhibitor, Thonningianin A, improves Alzheimer's disease by activating GPX4
Source: PubMed Central journal article supplement (PMC11488096; doi:10.7150/thno.98172), 2024-09-23
Supplement: thnov14p6161s1.pdf [file thnov14p6161s1.pdf]

1 Supplementary materials for

2 **A novel ferroptosis inhibitor, Thonningianin A, improves Alzheimer's disease by**  
3 **activating GPX4**

4 **Authors:** Yuanyuan Yong<sup>a,†</sup>, Lu Yan<sup>a,†</sup>, Jing Wei<sup>a,b,†</sup>, Chi Feng<sup>a,†</sup>, Lu Yu<sup>a</sup>, Jianming Wu<sup>a</sup>,  
5 Minsong Guo<sup>a</sup>, Dongsheng Fan<sup>c</sup>, Chonglin Yu<sup>a</sup>, Dalian Qin<sup>a,\*</sup>, Xiaogang Zhou<sup>a,\*</sup>,  
6 Anguo Wu<sup>a,\*</sup>

7 \*Corresponding author(s). Tel.: +86-17769617417; fax:+86-083031361222.

8 E-mail address(es): Dalian Qin, [dalianqin@swmu.edu.cn](mailto:dalianqin@swmu.edu.cn); Xiaogang Zhou,  
9 [zxg@swmu.edu.cn](mailto:zxg@swmu.edu.cn); Anguo Wu, [wuanguo@swmu.edu.cn](mailto:wuanguo@swmu.edu.cn).

10 **This Word file includes:**

11 **Figures S1 to S37 and Table S1**

12  
13  
14  
15  
16  
17  
18  
19  
20  
21  
22  
23  
24  
25  
26  
27  
28  
29

A1

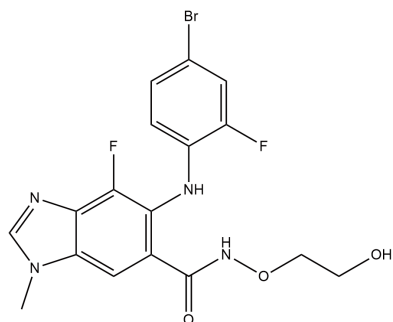

A2

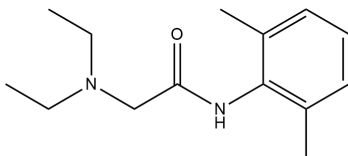

A3

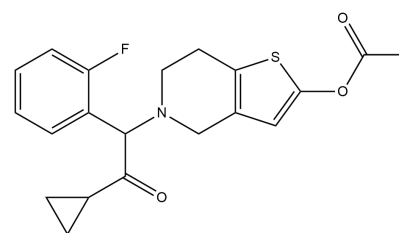

A4

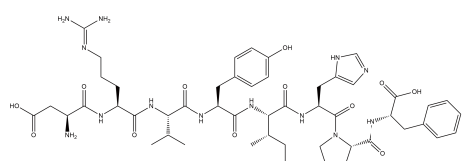

A5

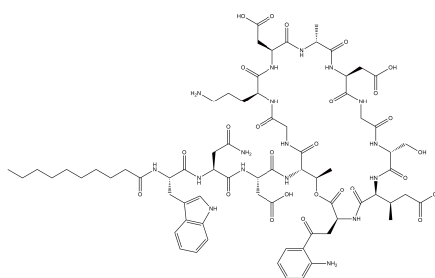

A6

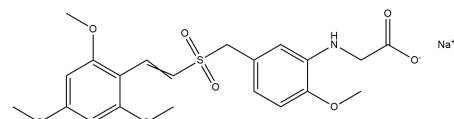

A7

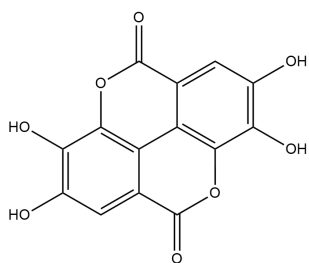

A8

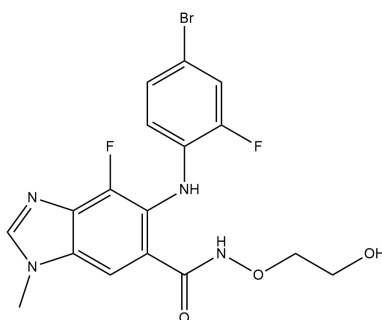

A9

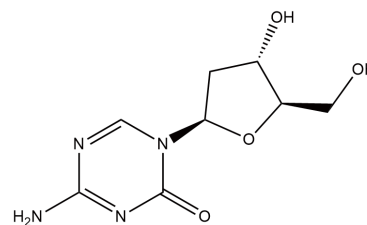

A10

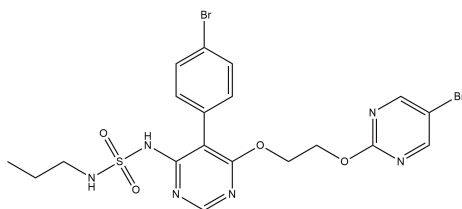

A11

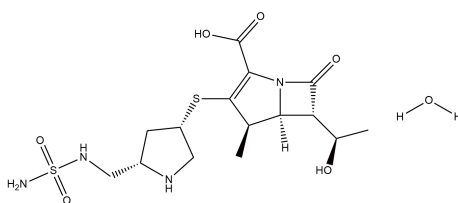

A12

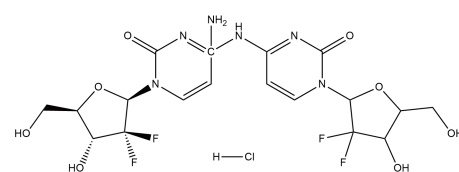

B1

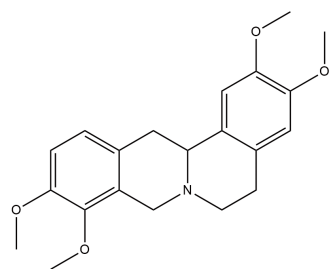

B2

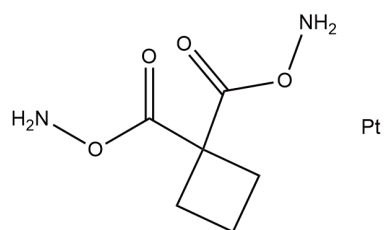

B3

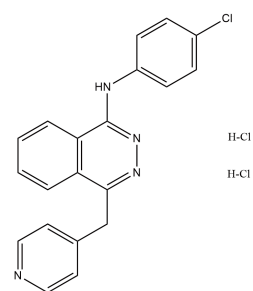

B4

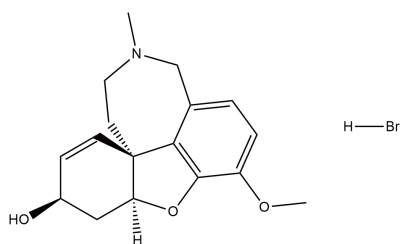

B5

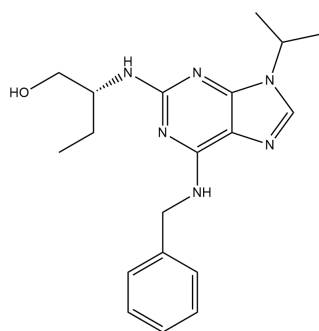

B6

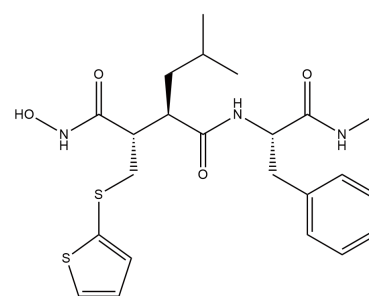

B7

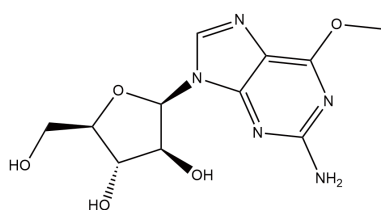

B8

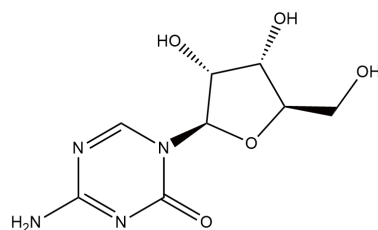

B9

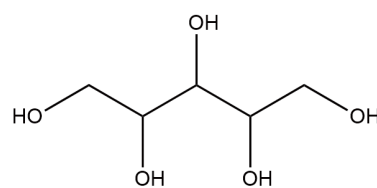

B10

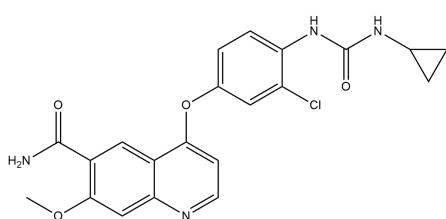

B11

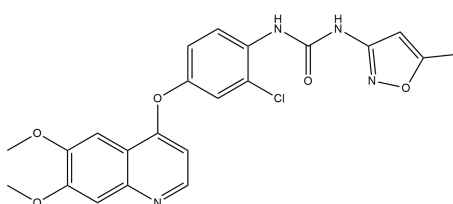

B12

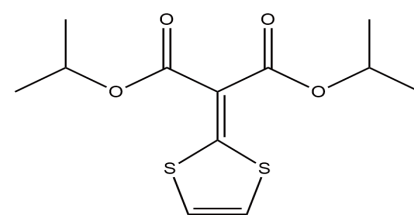

C1

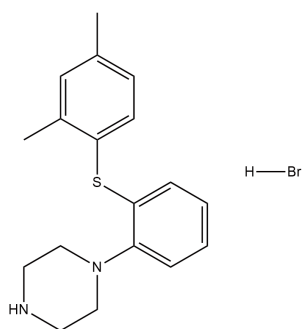

C2

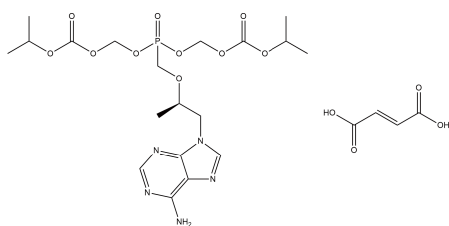

C3

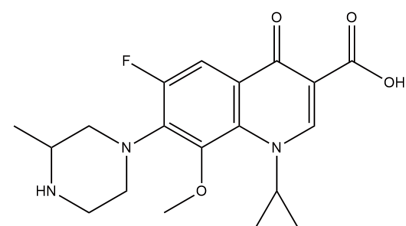

C4

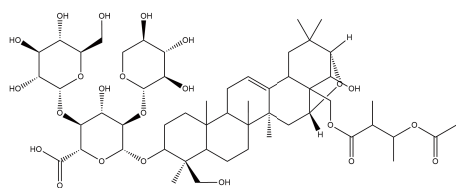

C5

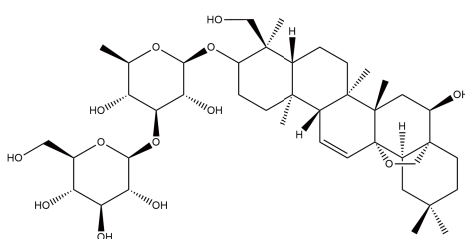

C6

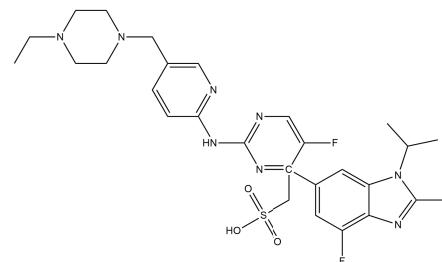

C7

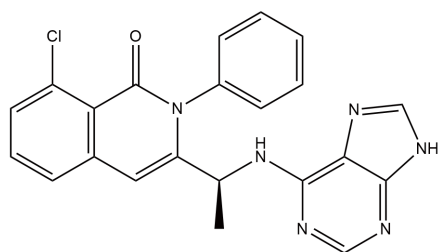

C8

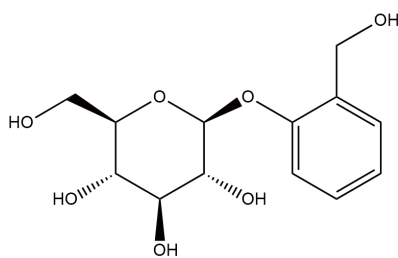

C9

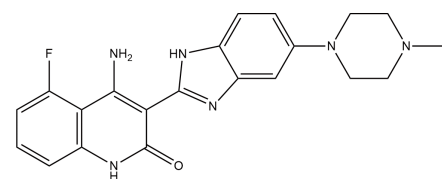

C10

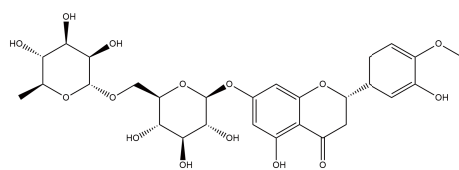

C11

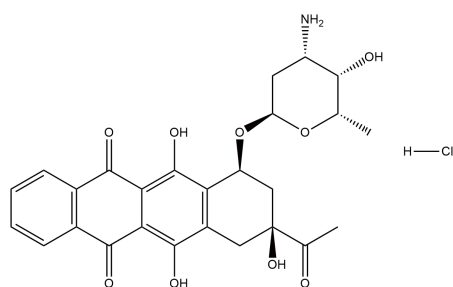

C12

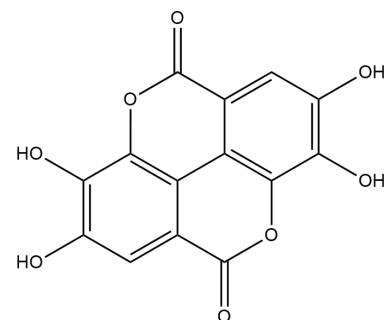

D1

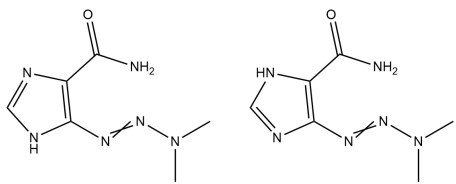

D2

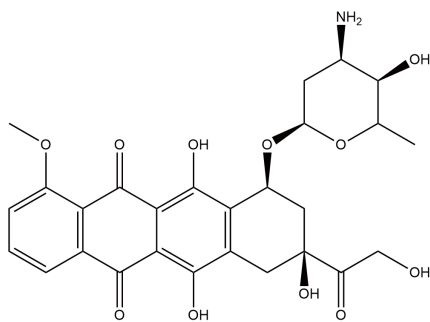

D3

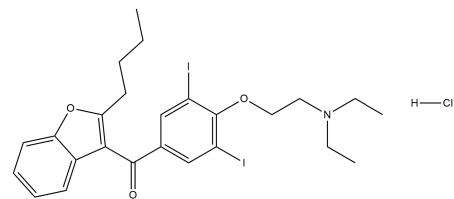

D4

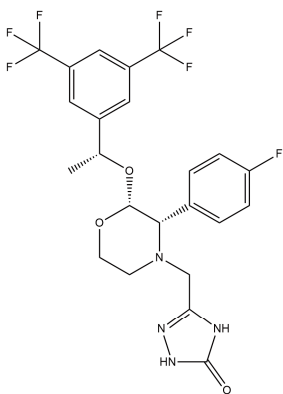

D5

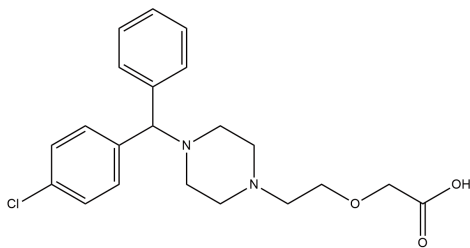

D6

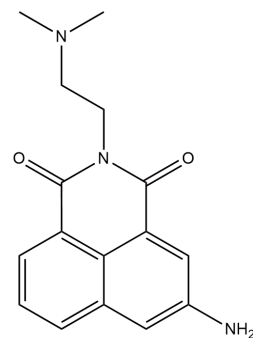

D7

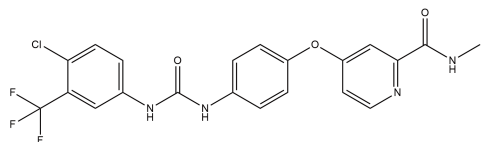

D8

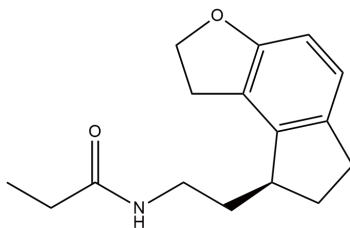

D9

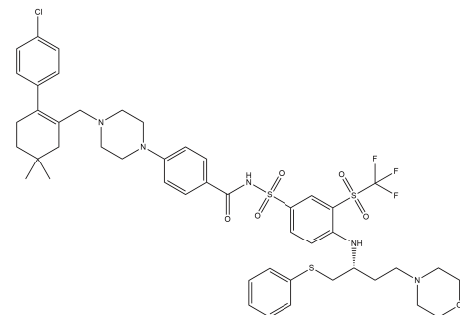

D10

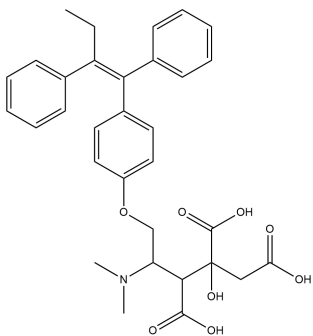

D11

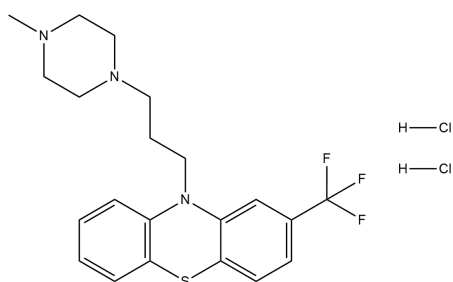

D12

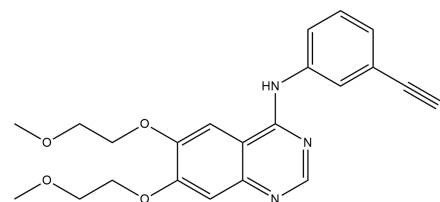

**E1**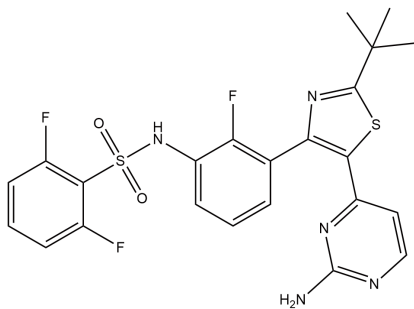**E2**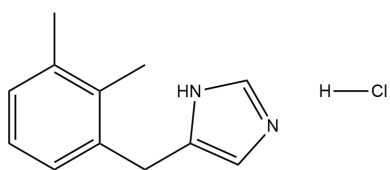**E3**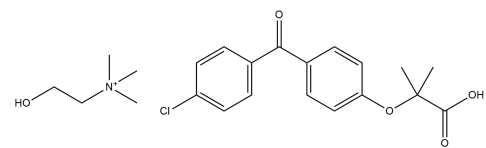**E4**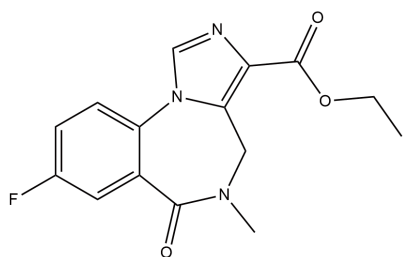**E5**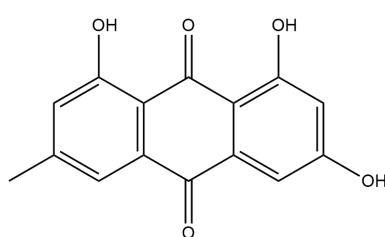**E6**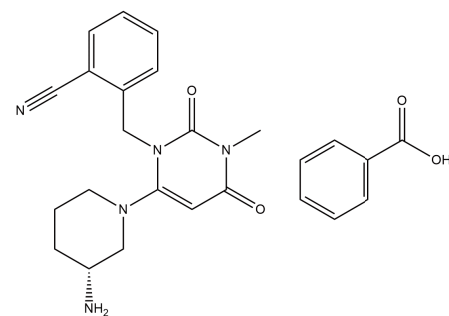**E7**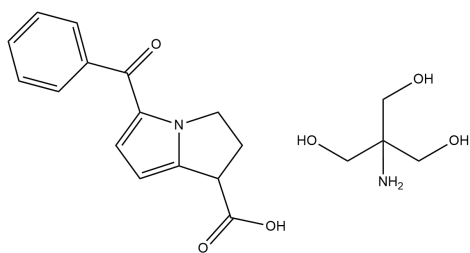**E8**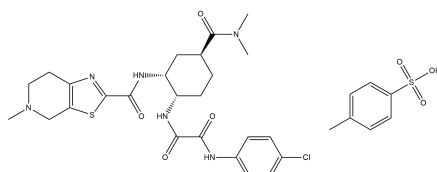**E9**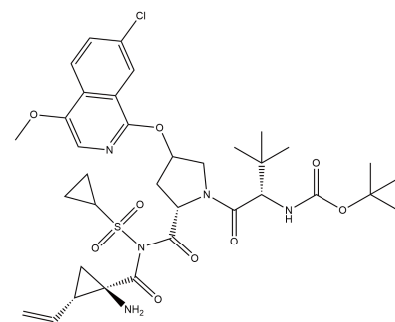**E10**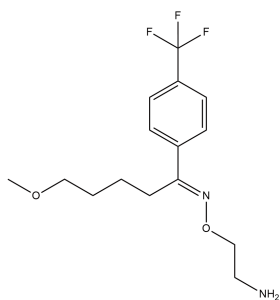**E11**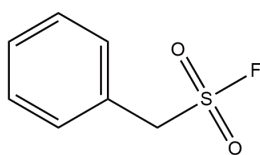**E12**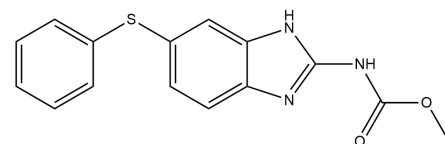

F1

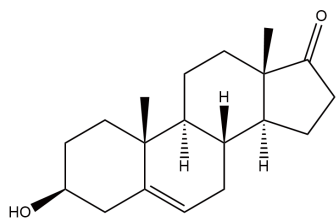

F2

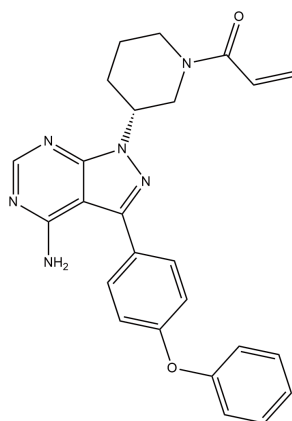

F3

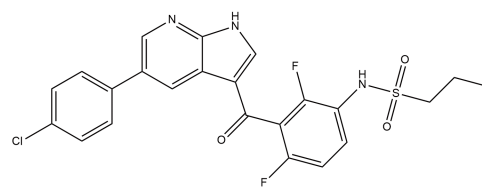

F4

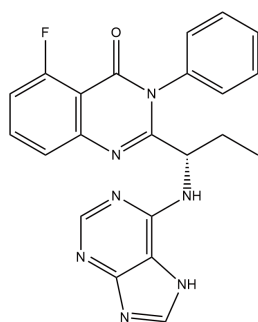

F5

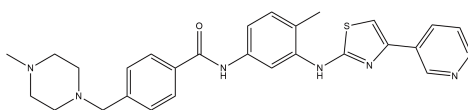

F6

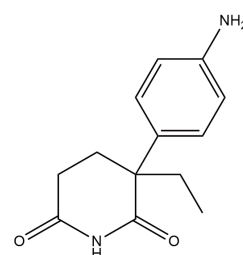

F7

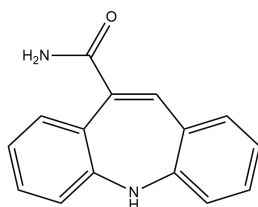

F8

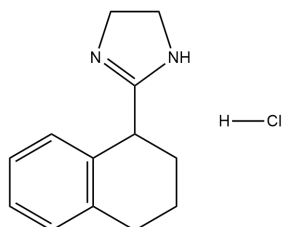

F9

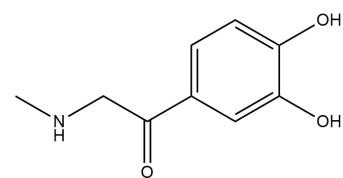

F10

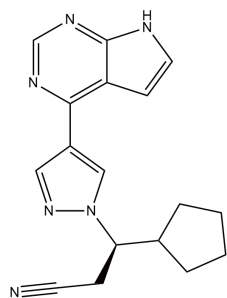

F11

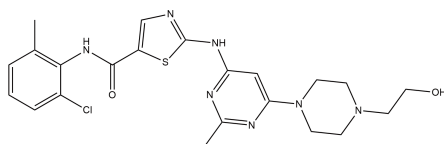

F12

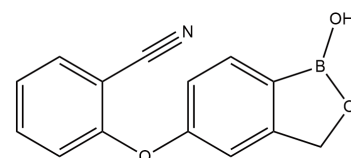

G1

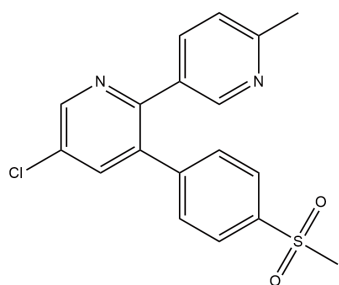

G2

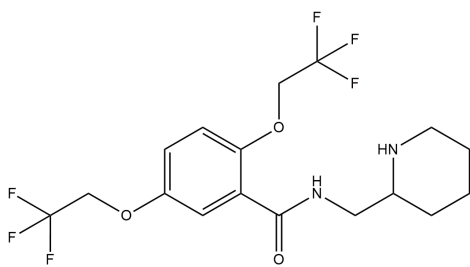

G3

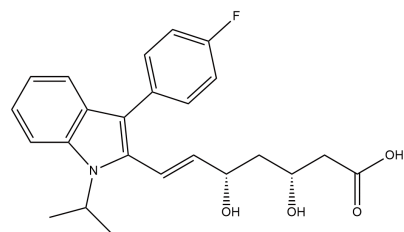

G4

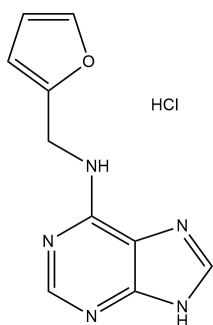

HCl

G7

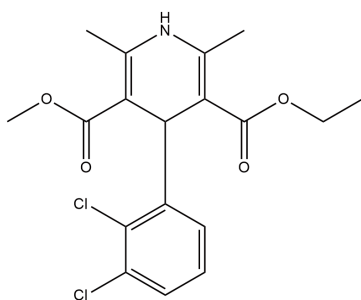

G10

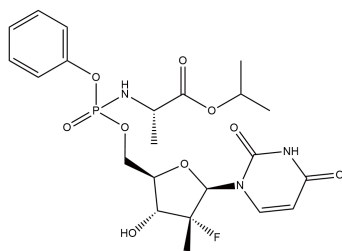

G5

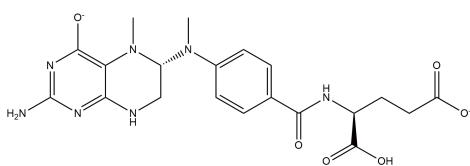

G8

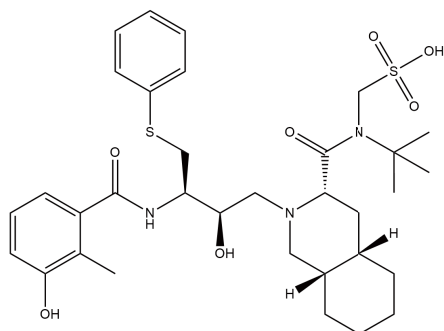

G11

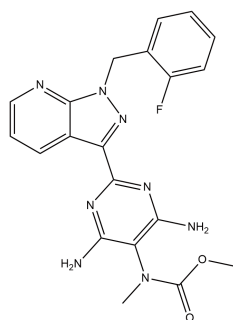

G6

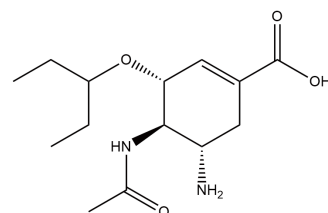

G9

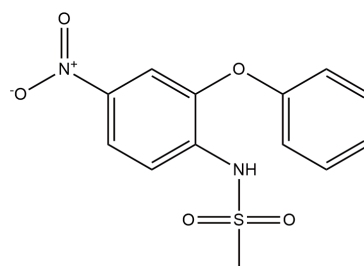

G12

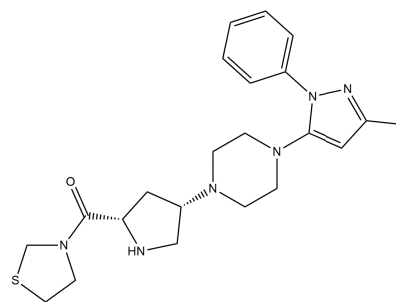



H1

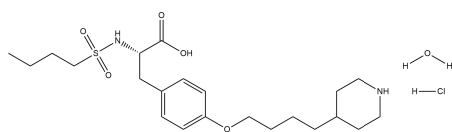

H2

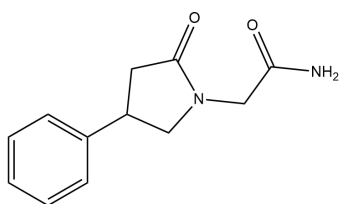

H3

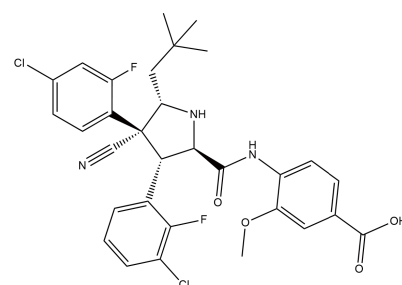

H4

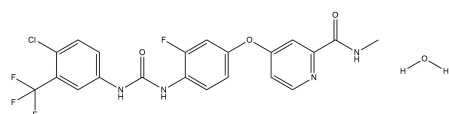

H5

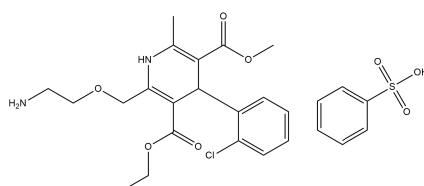

H6

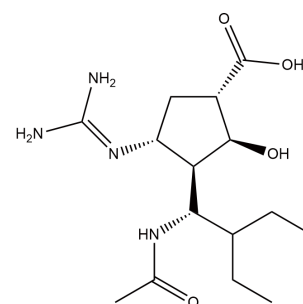

H7

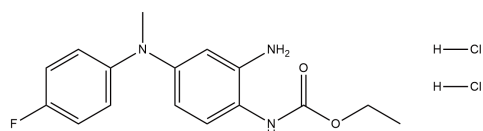

H8

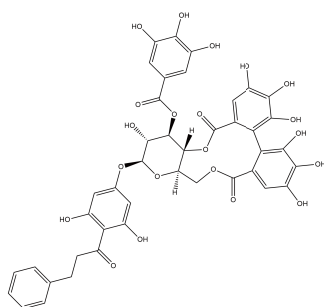

H9

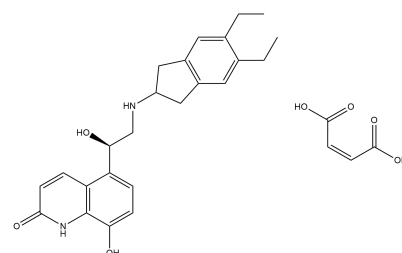

H10

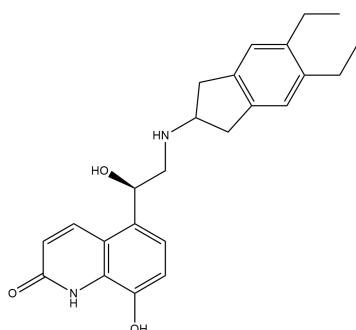

H11

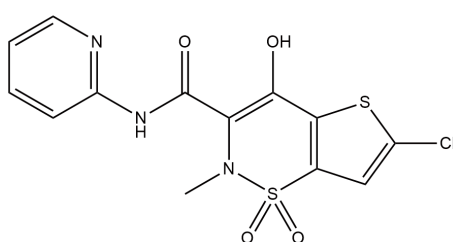

H12

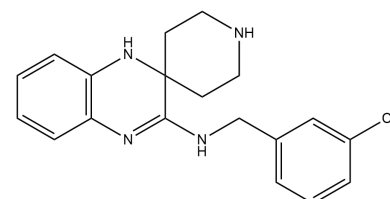

30 **Figure S1.** The chemical structures of the compounds used for screening ferroptosis  
 31 inhibitors in RSL-3-induced PC-12 cells are shown below. The chemical names of these  
 32 compounds are listed in Table S1.

33

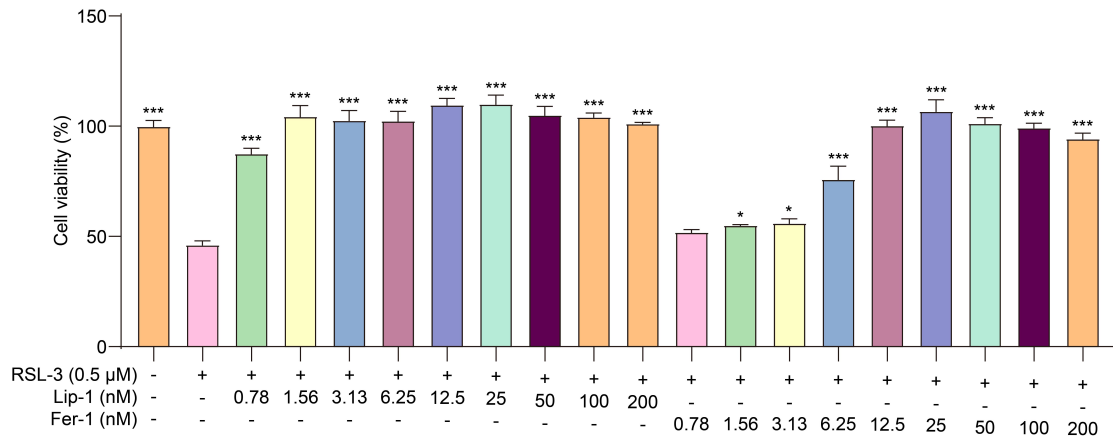

34

35 **Figure S2.** The effect of Lip-1 and Fer-1 at specified concentrations on the cell viability  
 36 of RSL-3-induced PC-12 cells. The bar chart indicates the cell viability of PC-12 cells  
 37 measured by MTT assay. Bar, SD. \*,  $p < 0.05$ ; \*\*,  $p < 0.01$ ; \*\*\*,  $p < 0.001$ .

38

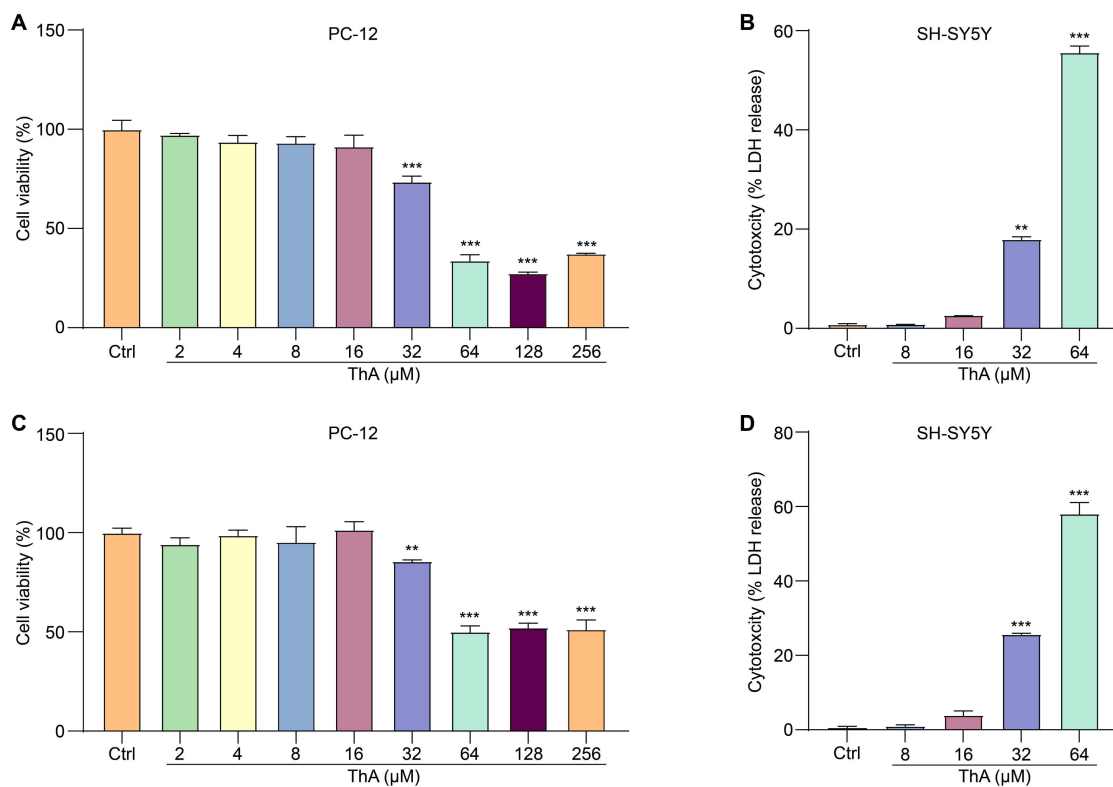

39

40 **Figure S3.** Evaluation of cell viability and cytotoxicity using MTT and LDH assays.  
 41 (A) and (C) show the percentage of cell viability in PC-12 and SH-SY5Y cells treated  
 42 with varying concentrations of ThA (2, 4, 8, 16, 32, 64, 128, 256 μM) as measured by  
 43 the MTT assay. (B) and (D) display the cytotoxicity in PC12 and SH-SY5Y cells at the  
 44 same ThA concentrations, as assessed by LDH release. Bar, SD. \*\*,  $p < 0.01$ ; \*\*\*,  $p <$   
 45 0.001.

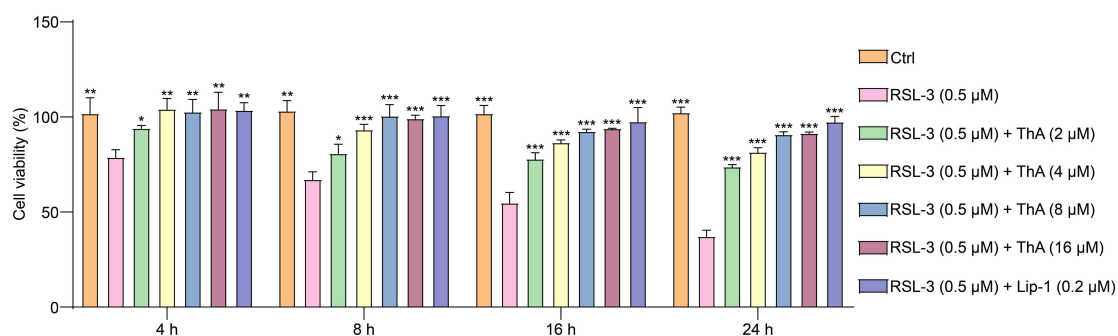

46  
 47 **Figure S4.** ThA increases the viability of PC-12 cells treated with RSL-3 at 4, 8, 16,  
 48 and 24 h. The bar chart indicates the cell viability of PC-12 cells measured by MTT  
 49 assay. Bar, SD. \*,  $p < 0.05$ ; \*\*,  $p < 0.01$ ; \*\*\*,  $p < 0.001$ .

50

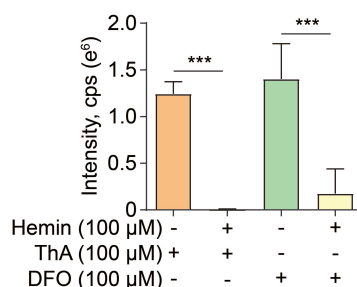

51  
 52 **Figure S5.** UHPLC-DAD-Q/TOF-MS/MS analysis of ThA and DFO in the samples,  
 53 including ThA, DFO, ThA + hemin, and DFO + hemin group. The bar chart indicates  
 54 the peak intensity of ThA and DFO in these samples. Bar, SD. \*,  $p < 0.05$ ; \*\*,  $p < 0.01$ ;  
 55 \*\*\*,  $p < 0.001$ .

56

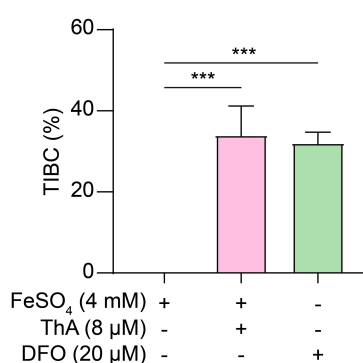

57  
 58 **Figure S6.** The iron chelating ability of ThA and DFO. The bar chart indicates the TIBC  
 59 of ThA and DFO measured by the TIBC assay kit. Bar, SD. \*,  $p < 0.05$ ; \*\*,  $p < 0.01$ ;  
 60 \*\*\*,  $p < 0.001$ .

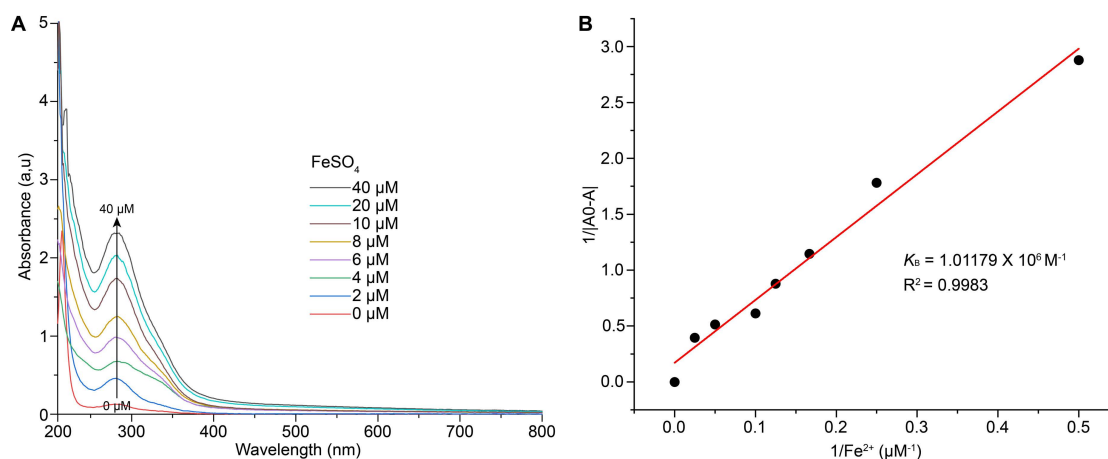

61

62 **Figure S7.** Absorption spectra of ThA in the presence of Fe<sup>2+</sup> at various concentrations  
 63 (0, 2, 4, 6, 8, 10, 20, 40 μM). (A) The absorbance was measured across a wavelength  
 64 range of 200-800 nm, showing changes in the spectral profile as the concentration of  
 65 Fe<sup>2+</sup> increases. (B) Double reciprocal plot of 1/(A<sub>0</sub>-A) versus 1/[Fe<sup>2+</sup>] based on the  
 66 absorption data. The linear fit provides a binding constant  $K_B=1.01179 \times 10^6 \text{ M}^{-1}$  and a  
 67 correlation coefficient  $R^2=0.9983$ .

68

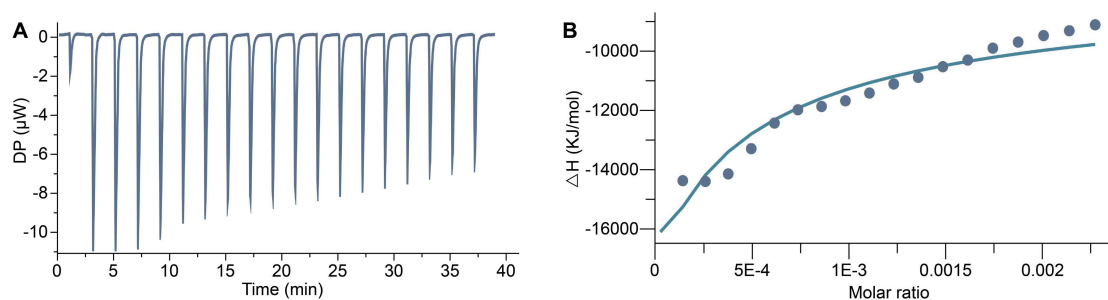

69

70 **Figure S8.** Isothermal titration calorimetry (ITC) analysis of the binding interaction  
 71 between Fe<sup>2+</sup> and ThA. (A) The raw ITC data showing the heat flow (DP) as a function  
 72 of time during sequential injections of Fe<sup>2+</sup> into the ThA solution. (B) The binding  
 73 isotherm derived from the ITC data, where the change in enthalpy (ΔH) is plotted  
 74 against the molar ratio of Fe<sup>2+</sup> to ThA. The data were fitted to a binding model to  
 75 calculate thermodynamic parameters of the interaction.

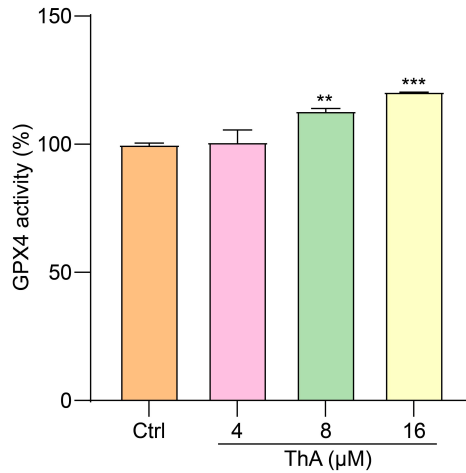

76

77 **Figure S9.** Measurement of GPX4 enzyme activity using the GPX4 Inhibitor Screening  
 78 Assay Kit. The bar graph shows the relative GPX4 activity induced by ThA at  
 79 concentrations of 4, 8, and 16 μM compared to the Ctrl. Bar, SD. \*\*,  $p < 0.01$ ; \*\*\*,  $p <$   
 80 0.001.

81

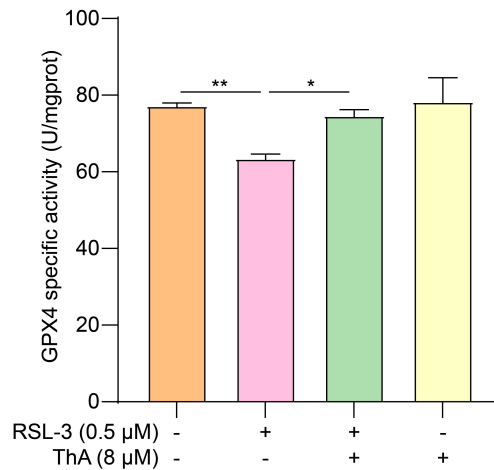

82

83 **Figure S10.** Measurement of GPX4 specific activity in PC12 cells using the  
 84 Glutathione Peroxidase 4 Assay Kit. The bar graph shows GPX4 activity (U/mg protein)  
 85 in cells under different treatment conditions: Ctrl, RSL-3 (0.5 μM) alone, RSL-3  
 86 combined with ThA (8 μM), and ThA (8 μM) alone. Bar, SD. \*,  $p < 0.05$ ; \*\*,  $p < 0.01$ .

87

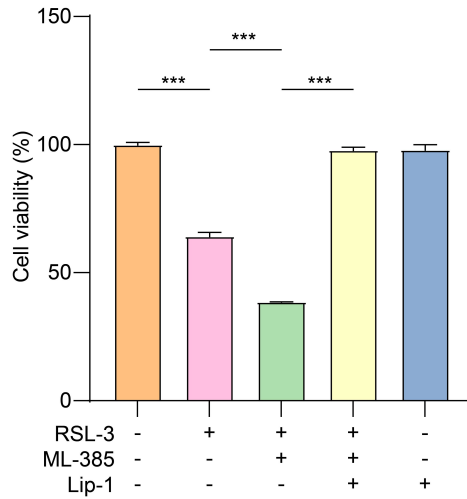

88

89 **Figure S11.** Effect of RSL-3, ML-385, and Lip-1 on cell viability. The bar graph shows  
 90 the percentage of viability in PC-12 cells under different treatment conditions: Ctrl,  
 91 RSL-3 (0.5  $\mu$ M) alone, RSL-3 combined with ML-385 (4  $\mu$ M), and RSL-3 combined  
 92 with Lip-1 (0.2  $\mu$ M). Bar, SD. \*\*\*,  $p < 0.001$ .

93

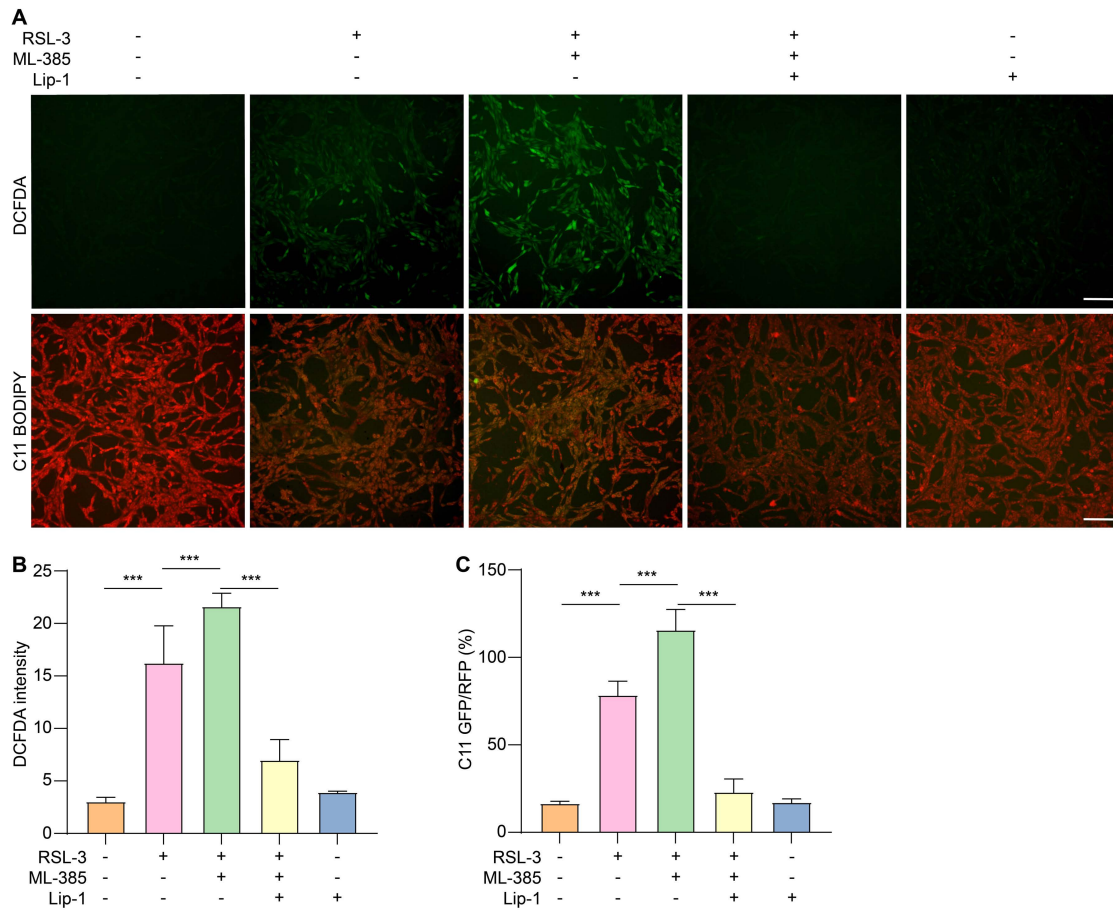

94

95 **Figure S12.** Evaluation of oxidative stress and lipid peroxidation in PC-12 cells treated  
 96 with RSL-3, ML-385, and Lip-1. (A) Representative fluorescence images showing

97 ROS levels detected by DCFDA (top row) and lipid peroxidation detected by C11  
 98 BODIPY (bottom row) under different treatment conditions. Scale bars: 200  $\mu$ m. (B)  
 99 Quantification of DCFDA fluorescence intensity, reflecting intracellular ROS levels.  
 100 (C) Quantification of C11 BODIPY fluorescence intensity ratio (GFP/RFP), indicating  
 101 the level of lipid peroxidation. Bar, SD. \*\*\*,  $p < 0.001$ .  
 102

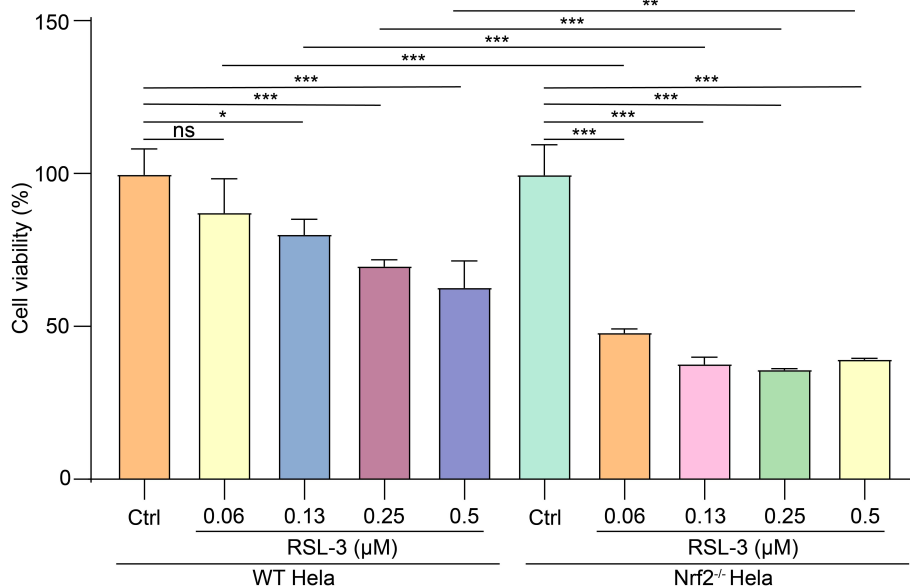

103  
 104 **Figure S13.** Cell viability assessment in WT and Nrf2<sup>-/-</sup> HeLa cells treated with  
 105 different concentrations of RSL-3, measured by the MTT assay. The bar graph shows  
 106 the percentage of cell viability after treatment with increasing concentrations of RSL-3  
 107 (0.06, 0.13, 0.25, 0.5  $\mu$ M) compared to the Ctrl in both WT and Nrf2<sup>-/-</sup> HeLa cells. Bar,  
 108 SD. \*,  $p < 0.05$ ; \*\*,  $p < 0.01$ ; \*\*\*,  $p < 0.001$ .  
 109

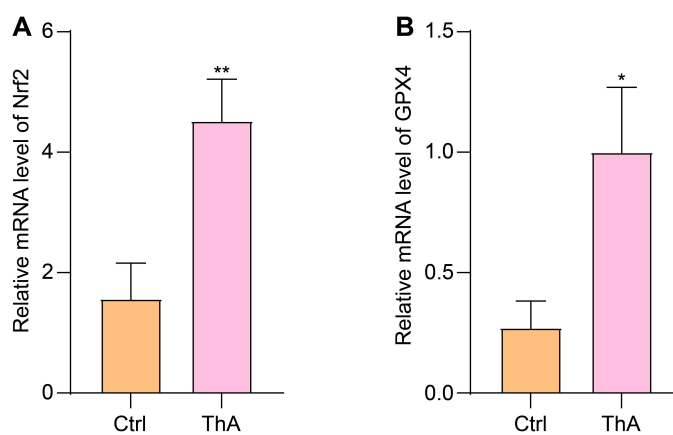

110

111 **Figure S14.** Relative mRNA expression levels of Nrf2 and GPX4 in PC-12 cells treated  
 112 with ThA. (A) The bar graph shows the relative mRNA level of Nrf2 in Ctrl and ThA-  
 113 treated cells. (B) The bar graph shows the relative mRNA level of GPX4 in Ctrl and  
 114 ThA-treated cells. Bar, SD. \*,  $p < 0.05$ ; \*\*,  $p < 0.01$ .  
 115

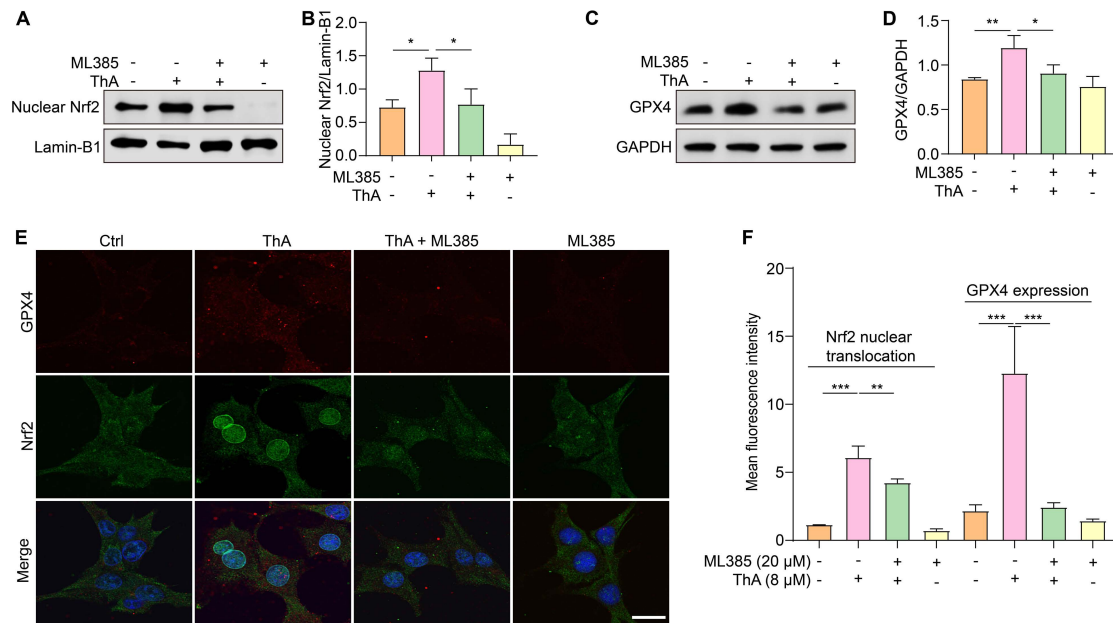

116  
 117 **Figure S15.** ML385 inhibits the nuclear translocation of Nrf2 and GPX4 expression in  
 118 PC-12 cells. (A, C) Representative Western blot images of nuclear Nrf2, GPX3, Lamin-  
 119 B1, and GAPDH in PC12 cells treated with 8  $\mu$ M ThA in the presence or absence of 20  
 120  $\mu$ M ML385. Full-length Western blot images are presented in Figure S36. (B, D) Bar  
 121 charts indicate the ratios of nuclear Nrf2 to lamin-B1 and GPX4 to GAPDH. (E)  
 122 Representative immunofluorescence images demonstrate Nrf2 nuclear translocation  
 123 and GPX4 expression in PC-12 cells treated with 8  $\mu$ M ThA in the presence or absence  
 124 of 20  $\mu$ M ML385. Magnification: 63 $\times$ , Scale bars: 50  $\mu$ m. (F) The bar chart indicates  
 125 the mean fluorescence intensity of Nrf2 nuclear translocation and GPX4 expression in  
 126 PC-12 cells. Bar, SD. \*,  $p < 0.05$ ; \*\*,  $p < 0.01$ ; \*\*\*,  $p < 0.001$ .



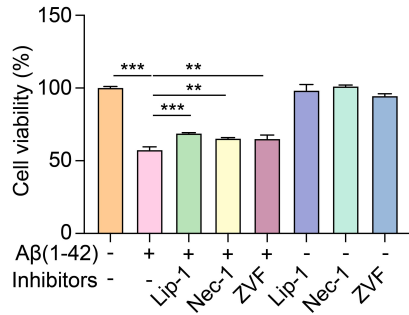

127

128 **Figure S16.** Aβ induces apoptosis, necrosis, and ferroptosis in PC-12 cells. The bar  
 129 chart indicates the cell viability of PC-12 cells treated with 25 μM Aβ(1-42) in the  
 130 presence or absence of 0.2 μM Lip-1, 10 μM Nec-1, and 2 μM ZVF. Bar, SD. \*,  $p <$   
 131 0.05; \*\*,  $p < 0.01$ ; \*\*\*,  $p < 0.001$ .

132

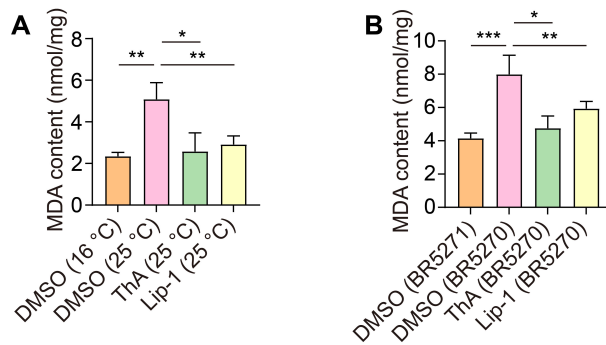

133

134 **Figure S17.** ThA reduces the MDA content in CL4176 and BR5270 worms. (A) The  
 135 bar chart indicates the relative MDA content in CL4176 worms treated with or without  
 136 20 μM ThA and 200 μM Lip-1. (B) The bar chart indicates the relative MDA content in  
 137 BR5271 and BR5270 worms treated with or without 20 μM ThA and 200 μM Lip-1.  
 138 Bar, SD. \*,  $p < 0.05$ ; \*\*,  $p < 0.01$ ; \*\*\*,  $p < 0.001$ .

139

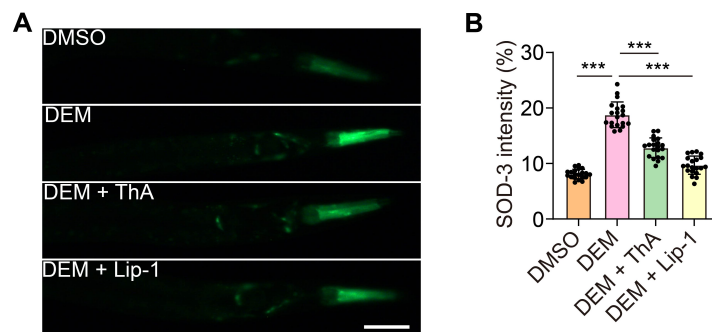

140

141 **Figure S18.** ThA reduces the SOD-3 intensity in CF1553 worms. (A) Representative  
 142 images of CF1553 worms treated with 1 mM DEM in the presence or absence of 20

143  $\mu\text{M}$  ThA and  $200 \mu\text{M}$  Lip-1. Magnification:  $\times 20$ ; scale bar:  $200 \mu\text{m}$ . (B) The bar charts  
 144 indicate the relative SOD-3 intensity in CF1553 worms. Bar, SD. \*,  $p < 0.05$ ; \*\*,  $p <$   
 145  $0.01$ ; \*\*\*,  $p < 0.001$ .

146

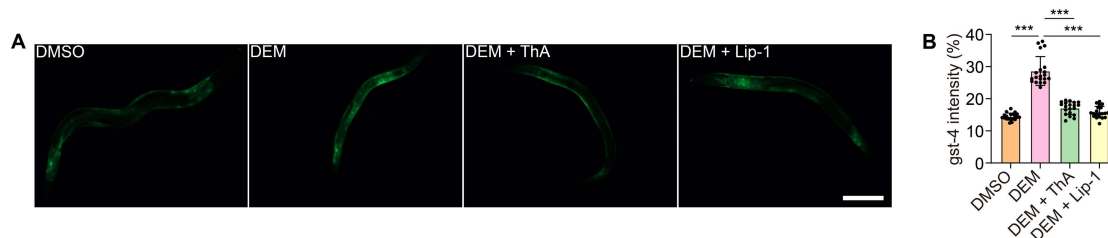

147

148 **Figure S19.** ThA reduces the *gst-4* intensity in CL2166 worms. (A) Representative  
 149 images of CL2166 worms treated with 1 mM DEM in the presence or absence of 20  
 150  $\mu\text{M}$  ThA and  $200 \mu\text{M}$  Lip-1. Magnification:  $\times 20$ ; scale bar:  $200 \mu\text{m}$ . (B) The bar charts  
 151 indicate the relative *gst-4* intensity in CL2166 worms. Bar, SD. \*,  $p < 0.05$ ; \*\*,  $p < 0.01$ ;  
 152 \*\*\*,  $p < 0.001$ .

153

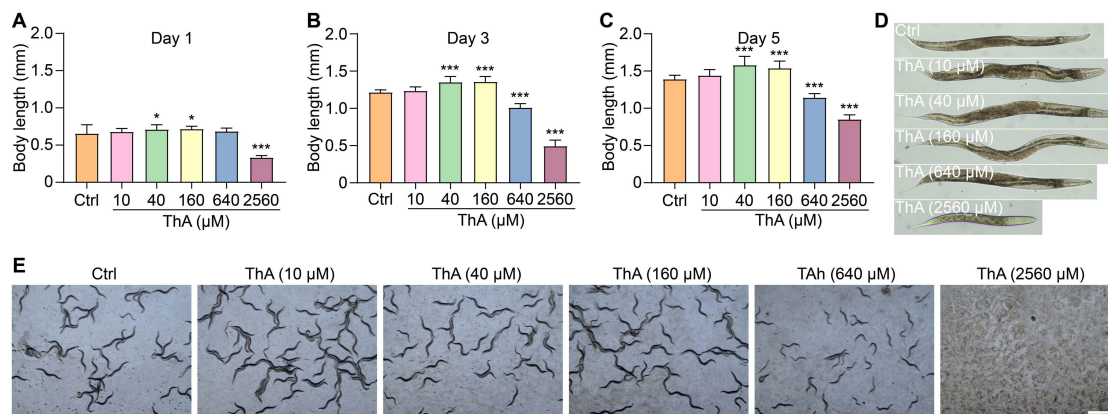

154

155 **Figure S20.** Effects of ThA on the body length and morphology of N2 *C. elegans*. (A-  
 156 C) Bar graphs showing the body length of *C. elegans* on Day 1, Day 3, and Day 5 after  
 157 exposure to different concentrations of ThA (10, 40, 160, 640, 2560  $\mu\text{M}$ ). (D)  
 158 Representative images of individual *C. elegans* from each treatment group on Day 5,  
 159 illustrating the effect of ThA on worm body length. Scale bar:  $100 \mu\text{m}$ . (E)  
 160 Representative images of the population and morphology of *C. elegans* under each  
 161 treatment condition. Scale bar:  $100 \mu\text{m}$ . Bar, SD. \*,  $p < 0.05$ ; \*\*,  $p < 0.01$ ; \*\*\*,  $p <$   
 162  $0.001$ .

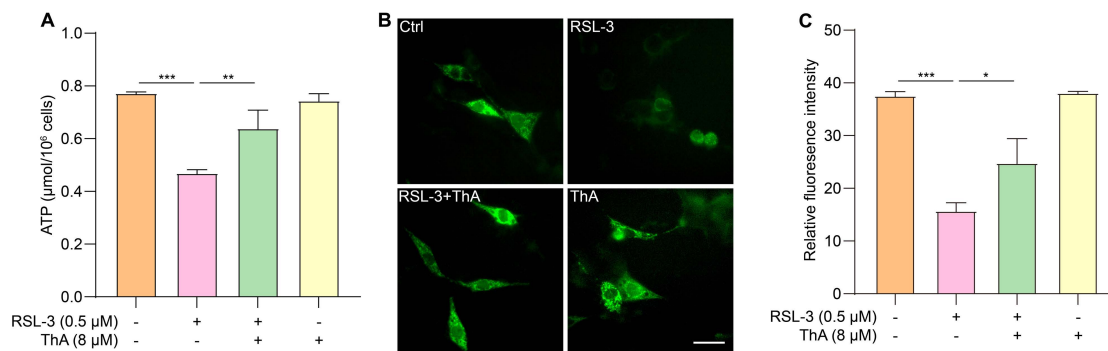

163

164 **Figure S21.** Assessment of intracellular ATP levels and mitochondrial ATP in PC-12  
 165 cells treated with RSL-3 in the presence or absence of ThA. (A) Bar graph showing  
 166 ATP levels ( $\mu\text{mol}/10^6$  cells) in different treatment groups: Ctrl, RSL-3 (0.5  $\mu\text{M}$ ), RSL-  
 167 3 combined with ThA (8  $\mu\text{M}$ ), and ThA (8  $\mu\text{M}$ ) alone. (B) Representative fluorescence  
 168 images showing mitochondrial ATP levels in PC-12 cells transfected with the pCMV-  
 169 Mito-AT1.03 plasmid, observed using fluorescence microscopy. Scale bar: 100  $\mu\text{m}$ . (C)  
 170 Quantification of relative fluorescence intensity from the mitochondrial ATP sensor,  
 171 indicating changes in mitochondrial ATP production. Bar, SD. \*,  $p < 0.05$ ; \*\*,  $p < 0.01$ ;  
 172 \*\*\*,  $p < 0.001$ .

173

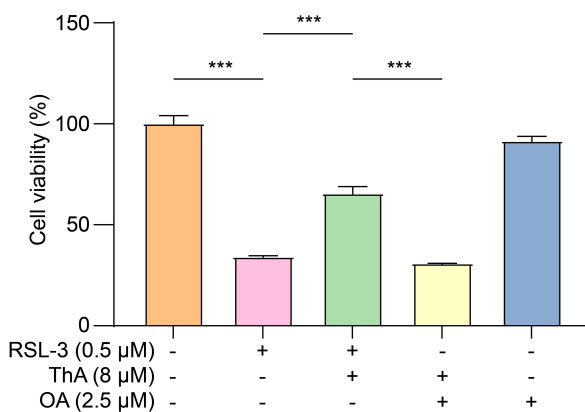

174

175 **Figure S22.** Effect of RSL-3, ThA, and OA on cell viability. The bar graph shows the  
 176 percentage of cell viability under different treatment conditions: Ctrl, RSL-3 (0.5  $\mu\text{M}$ )  
 177 alone, RSL-3 combined with ThA (8  $\mu\text{M}$ ), RSL-3 combined with OA (2.5  $\mu\text{M}$ ), and OA  
 178 alone. Bar, SD. \*\*\*,  $p < 0.001$ .

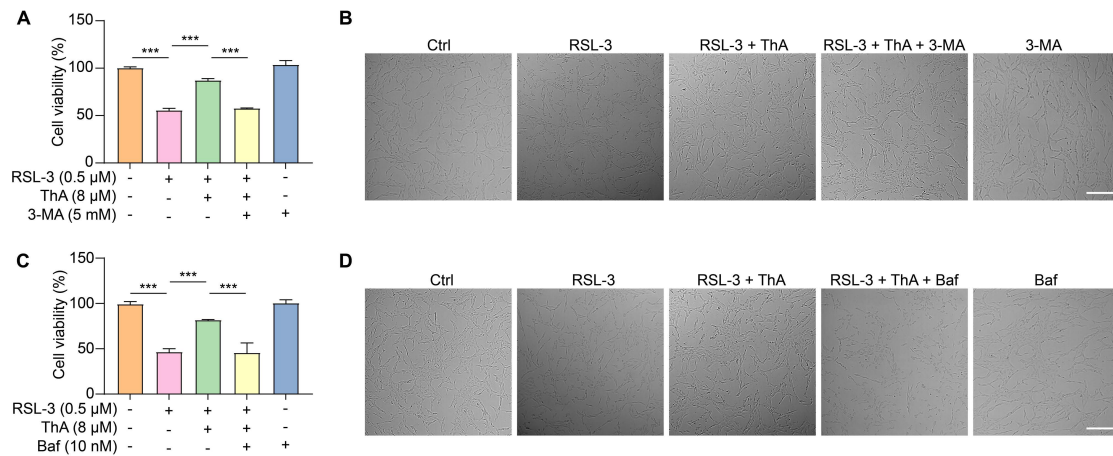

179

180 **Figure S23.** Autophagy inhibitors 3-MA and Baf reverse the inhibitory effect of ThA  
 181 on the cell death of RSL-3-induced PC-12 cells. (A, C) Bar charts indicate the cell  
 182 viability of RSL-3-induced PC-12 cells, treated with ThA in the presence or absence of  
 183 3-MA and Baf at specified concentrations. Bar, SD. \*,  $p < 0.05$ ; \*\*,  $p < 0.01$ ; \*\*\*,  $p <$   
 184 0.001. (B, D) Representative images of RSL-3-induced PC-12 cells, treated with ThA  
 185 in the presence or absence of 3-MA and Baf at specified concentrations. Magnification:  
 186 10 $\times$ , Scale bars: 200  $\mu$ m.

187

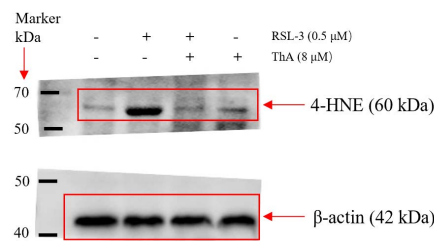

188

189 **Figure S24.** Full-length Western blotting images of Figure 1P

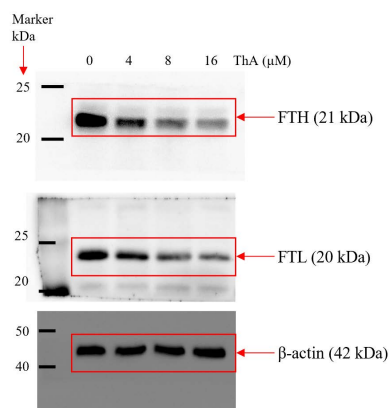

190 **Figure S25.** Full-length Western blotting images of Figure 2P

191

192

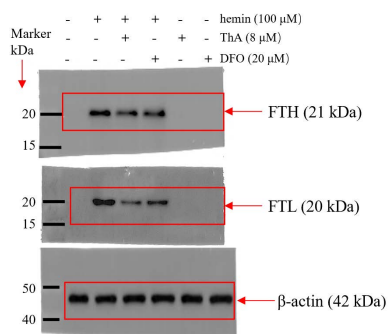

193 **Figure S26.** Full-length Western blotting images of Figure 2S

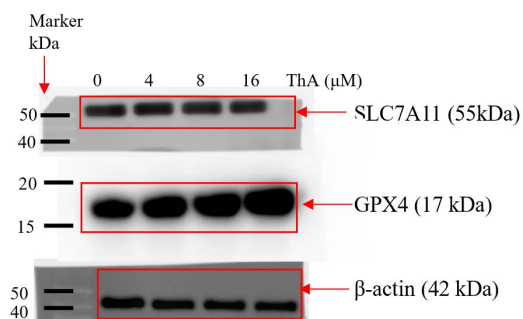

194 **Figure S27.** Full-length Western blotting images of Figure 3A

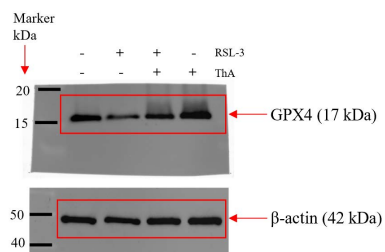

195

196 **Figure S28.** Full-length Western blotting images of Figure 3D

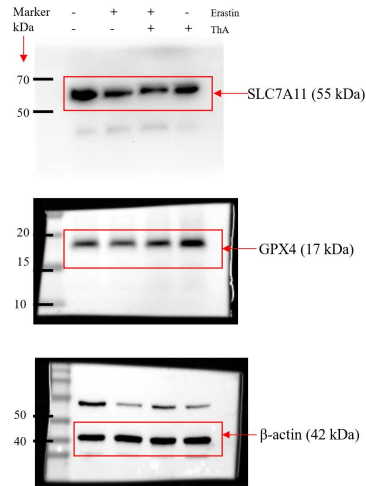

197

198 **Figure S29.** Full-length Western blotting images of Figure 3F

199

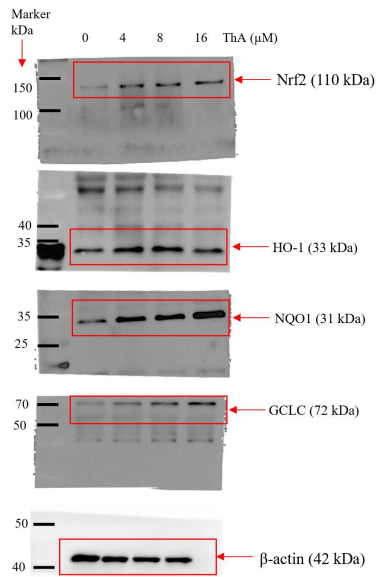

200

201 **Figure S30.** Full-length Western blotting images of Figure 4A

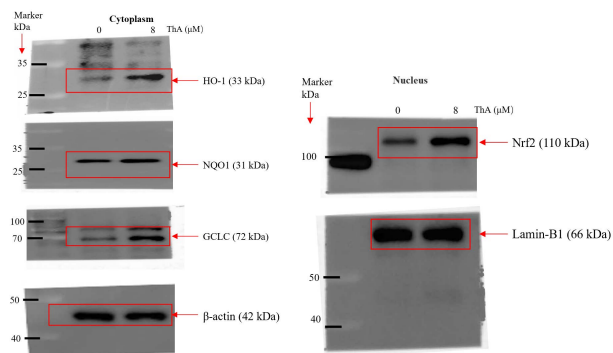

202

203 **Figure S31.** Full-length Western blotting images of Figure 4F

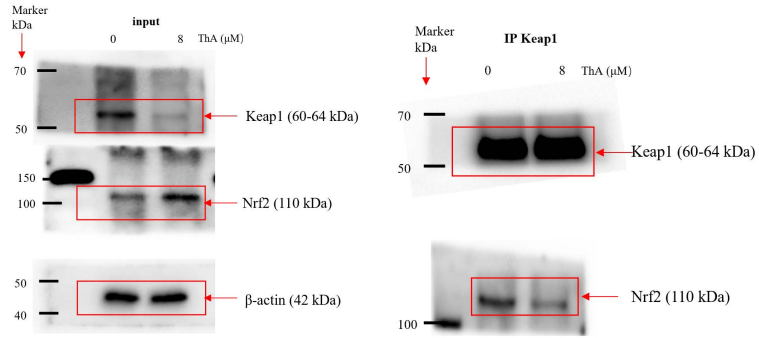

204

205 **Figure S32.** Full-length Western blotting images of Figure 4K

206

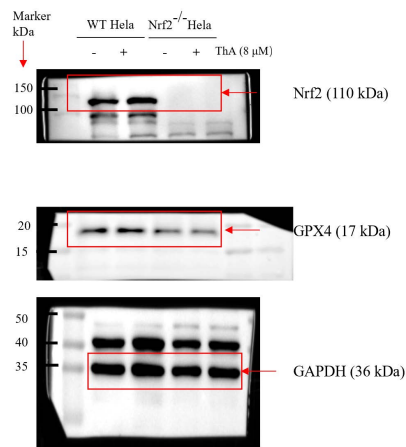

207

208 **Figure S33.** Full-length Western blotting images of Figure 5L

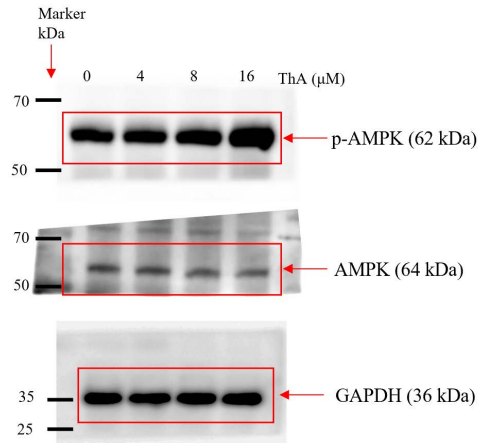

209

210 **Figure S34.** Full-length Western blotting images of Figure 6A

211

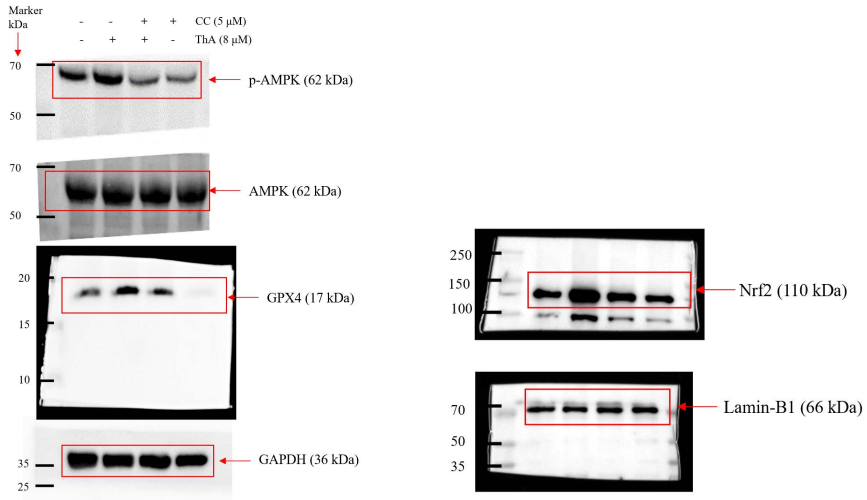

212

213 **Figure S35.** Full-length Western blotting images of Figure 6C

214

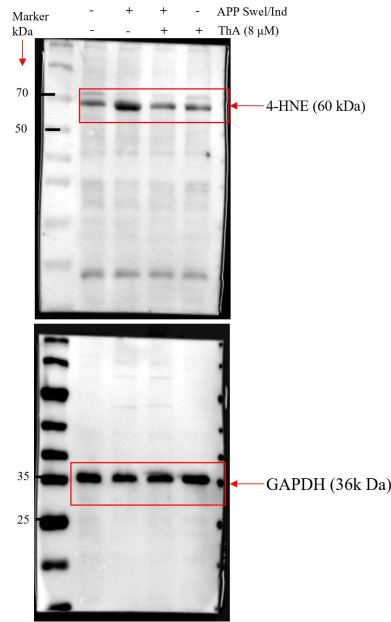

215

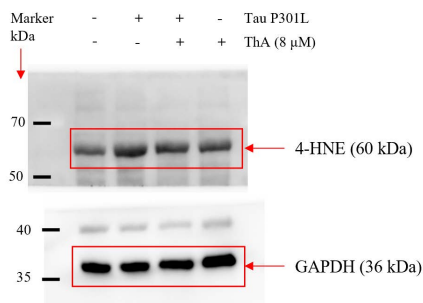

216

217 **Figure S36.** Full-length Western blotting images of Figure 7I and K

218



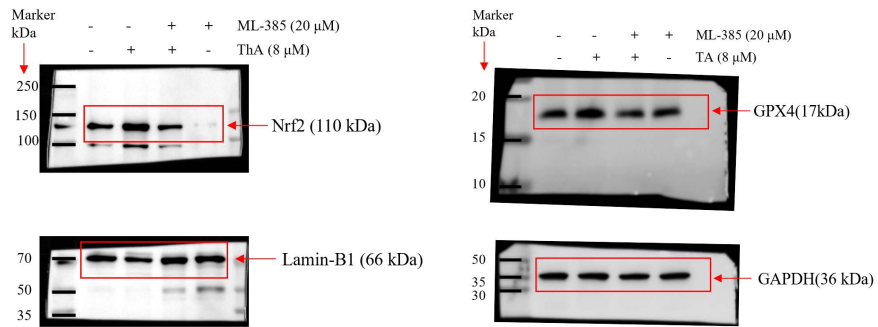

219

220 **Figure S37.** Full-length Western blotting images of Figure S15A and C

221

222

223

224

225

226

227

228

229

230

231

232

233

234

235

236

237

238

239

240

241

242

243

244 **Table S1.** The compounds used for screening ferroptosis inhibitors in RSL-3-induced  
 245 PC-12 cells.

|                                                 |                                           |                                  |                                  |                               |                              |                                         |                                           |                               |                               |                                          |                                      |
|-------------------------------------------------|-------------------------------------------|----------------------------------|----------------------------------|-------------------------------|------------------------------|-----------------------------------------|-------------------------------------------|-------------------------------|-------------------------------|------------------------------------------|--------------------------------------|
| A1<br>MEK162                                    | A2<br>Lidocaine                           | A3<br>Prasugrel                  | A4<br>Angiotensin II             | A5<br>Daptomycin              | A6<br>Rigosertib             | A7<br>Levetiracetam                     | A8<br>MEK162                              | A9<br>Decitabine              | A10<br>Macitentan             | A11<br>Doripenem<br>hydrate              | A12<br>Gemcitabine<br>HCl            |
| B1<br>Imatinib<br>mesylate                      | B2<br>Carboplatin                         | B3<br>Vatalanib<br>(PTK787) 2HCl | B4<br>Galanthamine<br>HBr        | B5<br>Roscovitine             | B6<br>Batimastat             | B7<br>Nelarabine                        | B8<br>5-Azacytidine                       | B9<br>Xylitol                 | B10<br>Lenvatinib             | B11<br>Tivozanib                         | B12<br>Malotilate                    |
| C1<br>Vortioxetine<br>HBr                       | C2<br>Tenofovir<br>disoproxil<br>fumarate | C3<br>Gatifloxacin               | C4<br>Sodium<br>aescinate        | C5<br>Saikosaponin A          | C6<br>LY2835219              | C7<br>IPI-145                           | C8<br>D(-)-Salicin                        | C9<br>Dovitinib               | C10<br>Idarubicin HCl         | C11<br>Idarubicin HCl                    | C12<br>Ellagic acid                  |
| D1<br>Dacarbazine                               | D2<br>Epirubicin HCl                      | D3<br>Amiodarone HCl             | D4<br>Aprepitant                 | D5<br>Cetirizine              | D6<br>Amonafide              | D7<br>Sorafenib                         | D8<br>ABT-263                             | D9<br>Cinacalcet HCl          | D10<br>Tamoxifen<br>citrate   | D11<br>Trifluoperazine<br>2HCl           | D12<br>Erlotinib                     |
| E1<br>Dabrafenib<br>mesylate                    | E2<br>Detomidine HCl                      | E3<br>Choline<br>fenofibrate     | E4<br>Flumazenil                 | E5<br>Emodin                  | E6<br>Alogliptin<br>benzoate | E7<br>Ketorolac<br>tromethamine<br>salt | E8<br>Edoxaban<br>tosylate<br>monohydrate | E9<br>Asunaprevir             | E10<br>Fluvoxamine<br>maleate | E11<br>Phenylmethylsul<br>fonyl fluoride | E12<br>Fenbendazole                  |
| F1<br>Dehydroepiandr<br>osterone                | F2<br>Ibrutinib                           | F3<br>Vemurafenib                | F4<br>Idelalisib                 | F5<br>Masitinib               | F6<br>Aminoglutethimi<br>de  | F7<br>Carbamazepine                     | F8<br>Tetrahydrozoline<br>HCl             | F9<br>Adrenalone HCl          | F10<br>Ruxolitinib            | F11<br>AN-2728                           | F12<br>Tedizolid                     |
| G1<br>Etoricoxib                                | G2<br>Flecainide<br>acetate               | G3<br>Fluvastatin                | G4<br>Kinetin                    | G5<br>Levomefolate<br>calcium | G6<br>Oseltamivir            | G7<br>Oseltamivir acid                  | G8<br>Potassium<br>canrenoate             | G9<br>Nimesulide              | G10<br>Sofosbuvir             | G11<br>Riociguat                         | G12<br>Teneligliptin<br>hydrobromide |
| H1<br>Tirofiban<br>hydrochloride<br>monohydrate | H2<br>Phenylpiracetam                     | H3<br>RG7388                     | H4<br>Regorafenib<br>monohydrate | H5<br>Amlodipine<br>Besylate  | H6<br>Peramivir              | H7<br>Retigabine<br>dihydrochloride     | H8<br>Thonningianin A                     | H9<br>Salmeterol<br>xinafoate | H10<br>Indacaterol<br>maleate | H11<br>Lornoxicam                        | H12<br>Liproxstatin-1                |
